# Supplementary material for: In Utero Exposures, Infant Growth, and DNA Methylation of Repetitive Elements and Developmentally Related Genes in Human Placenta
Source: PubMed Central journal article supplement (PMC3279448; doi:10.1289/ehp.1103927), 2011-10-17
Supplement: ehp.1103927.s001.pdf [file ehp.1103927.s001.pdf]

**Supplemental Materials:**

**In Utero Exposures, Infant Growth, and DNA Methylation of Repetitive Element and Developmentally Related Genes in Human Placenta**

C.S. Wilhelm-Benartzi, E.A. Houseman, M.A. Maccani, G.M. Poage, D.C. Koestler, S.M. Langevin, L.A. Gagne, C. Banister, J.F. Padbury, C.J. Marsit

**Table of Contents:**

|                                                      |       |
|------------------------------------------------------|-------|
| 1) Supplemental Materials, Table 1.....              | pg. 2 |
| 2) Supplemental Materials, Table 2.....              | pg. 3 |
| 3) Supplemental Materials, Figure 1 .....            | pg. 4 |
| 4) Supplemental Materials, Figure 2 .....            | pg. 5 |
| 5) Supplemental Materials, Supplementary Text 1..... | pg. 6 |
| 6) Supplemental Materials, Supplementary Text 2..... | pg. 7 |
| 7) Supplemental Materials, References.....           | pg. 8 |

**Table 1: Population characteristics by birthweight status**

| Characteristic                             | Total population (N=380) | SGA n=62 (16.3%) | AGA n=304 (80.0%) | LGA n=14 (3.7%) | p-value |
|--------------------------------------------|--------------------------|------------------|-------------------|-----------------|---------|
| Birthweight percentile, mean +/- SD        | 39.3+/- 28.6             | 5.2 +/- 2.5      | 43.7 +/- 24.9     | 95.8 +/- 3.2    | NA      |
| Maternal age, mean +/- SD                  | 28.1+/- 5.7              | 26.7 +/- 5.5     | 28.4 +/- 5.8      | 28.6 +/- 5.3    | 0.11    |
| Maternal BMI before pregnancy, mean +/- SD | 25.9 +/- 5.3             | 25.3 +/- 5.1     | 26.0 +/- 5.4      | 24.7 +/- 2.8    | 0.61    |
| Gestation_weeks, mean +/- SD               | 38.8 +/- 1.1             | 38.5 +/- 1.1     | 38.9 +/- 1.1      | 38.5 +/- 0.9    | 0.82    |
| Mean LINE1, mean +/- SD                    | 51.7 +/- 4.6             | 50.9 +/- 4.2     | 51.9 +/- 4.8      | 51.9 +/- 3.0    | <0.0001 |
| Mean Alu Yb8, mean +/- SD                  | 65.0 +/- 3.3             | 64.4 +/- 4.0     | 65.0 +/- 3.1      | 66.6 +/- 2.3    | <0.0001 |
| Array-based methylation, mean +/- SD* c.   | 0.24 +/- 0.01            | 0.24 +/- 0.01    | 0.24 +/- 0.02     | 0.23 +/- 0.01   | 0.59    |
| Ethnicity mother, n (%)                    |                          |                  |                   |                 |         |
| Non-Caucasian                              | 163 (42.9)               | 37 (59.7)        | 122 (40.1)        | 4 (28.6)        |         |
| Caucasian                                  | 217 (57.1)               | 25 (40.3)        | 182 (59.9)        | 10 (71.4)       | 0.01    |
| Infant gender, n (%)                       |                          |                  |                   |                 |         |
| Female                                     | 190 (50.0)               | 35 (56.5)        | 149 (49.0)        | 6 (42.9)        |         |
| Male                                       | 190 (50.0)               | 27 (43.5)        | 155 (51.0)        | 8 (57.1)        | 0.49    |
| Tobacco use in pregnancy, n (%)            |                          |                  |                   |                 |         |
| No                                         | 343 (90.3)               | 51 (82.3)        | 278 (91.4)        | 14 (100)        |         |
| Yes                                        | 36 (9.7)                 | 11 (17.7)        | 25 (8.6)          | 0 (0)           | 0.03    |
| Alcohol use in pregnancy, n (%)            |                          |                  |                   |                 |         |
| No                                         | 377 (99.2)               | 61 (98.4)        | 302 (99.3)        | 14 (100)        |         |
| Yes                                        | 3 (0.8)                  | 1 (1.6)          | 2 (0.7)           | 0 (0)           | 0.70    |
| Prenatal vitamin use, n (%)                |                          |                  |                   |                 |         |
| No                                         | 66 (17.4)                | 8 (12.9)         | 56 (18.4)         | 2 (14.3)        |         |
| Yes                                        | 314 (82.6)               | 54 (87.1)        | 248 (81.6)        | 12 (85.7)       | 0.55    |

a. NA=Not available, Abbreviations: SD=standard deviation, BMI= body mass index,

SGA/AGA/LGA=small/appropriate/large for gestational age, LINE=long interspersed nuclear element

b. p-values were obtained by Kruskal Wallis and Chi square tests for SGA versus AGA versus LGA

c. This applies to a subsample (n=184) of our population where n=135 were AGA, n=43 were SGA and n=6 were LGA

**Table 2: Distribution of CpG loci by bioinformatically-derived class.**

| Genomic Attributes        | n <sub>loci</sub> | Percent Total |
|---------------------------|-------------------|---------------|
| None                      | 1638              | 6.184%        |
| TFBS                      | 4436              | 16.748%       |
| MIR                       | 99                | 0.374%        |
| MIR   TFBS                | 184               | 0.695%        |
| ALU                       | 68                | 0.257%        |
| ALU   TFBS                | 79                | 0.298%        |
| LINE2                     | 88                | 0.332%        |
| LINE2   TFBS              | 103               | 0.389%        |
| LINE2   MIR   TFBS        | 1                 | 0.004%        |
| LINE-1                    | 74                | 0.279%        |
| LINE-1   TFBS             | 48                | 0.181%        |
| PcG                       | 2347              | 8.861%        |
| PcG   TFBS                | 12958             | 48.924%       |
| PcG   MIR                 | 71                | 0.268%        |
| PcG   MIR   TFBS          | 253               | 0.955%        |
| PcG   ALU                 | 121               | 0.457%        |
| PcG   ALU   TFBS          | 173               | 0.653%        |
| PcG   LINE2               | 33                | 0.125%        |
| PcG   LINE2   TFBS        | 130               | 0.491%        |
| PcG   LINE-1              | 24                | 0.091%        |
| PcG   LINE-1   TFBS       | 35                | 0.132%        |
| CGI                       | 64                | 0.242%        |
| CGI   TFBS                | 315               | 1.189%        |
| CGI   MIR                 | 8                 | 0.030%        |
| CGI   MIR   TFBS          | 13                | 0.049%        |
| CGI   ALU                 | 3                 | 0.011%        |
| CGI   ALU   TFBS          | 1                 | 0.004%        |
| CGI   LINE2               | 3                 | 0.011%        |
| CGI   LINE2   TFBS        | 6                 | 0.023%        |
| CGI   LINE-1              | 2                 | 0.008%        |
| CGI   LINE-1   TFBS       | 1                 | 0.004%        |
| CGI   PcG                 | 330               | 1.246%        |
| CGI   PcG   TFBS          | 2692              | 10.164%       |
| CGI   PcG   MIR           | 4                 | 0.015%        |
| CGI   PcG   MIR   TFBS    | 33                | 0.125%        |
| CGI   PcG   ALU           | 10                | 0.038%        |
| CGI   PcG   ALU   TFBS    | 21                | 0.079%        |
| CGI   PcG   LINE2         | 4                 | 0.015%        |
| CGI   PcG   LINE2   TFBS  | 7                 | 0.026%        |
| CGI   PcG   LINE-1        | 5                 | 0.019%        |
| CGI   PcG   LINE-1   TFBS | 1                 | 0.004%        |
| Total                     | 26486             | 100%          |

a. Abbreviations: CGI = CpG island; TFBS = transcription factor binding sites; PcG = polycomb group protein target gene; MIR = mammalian wide-interspersed repeat

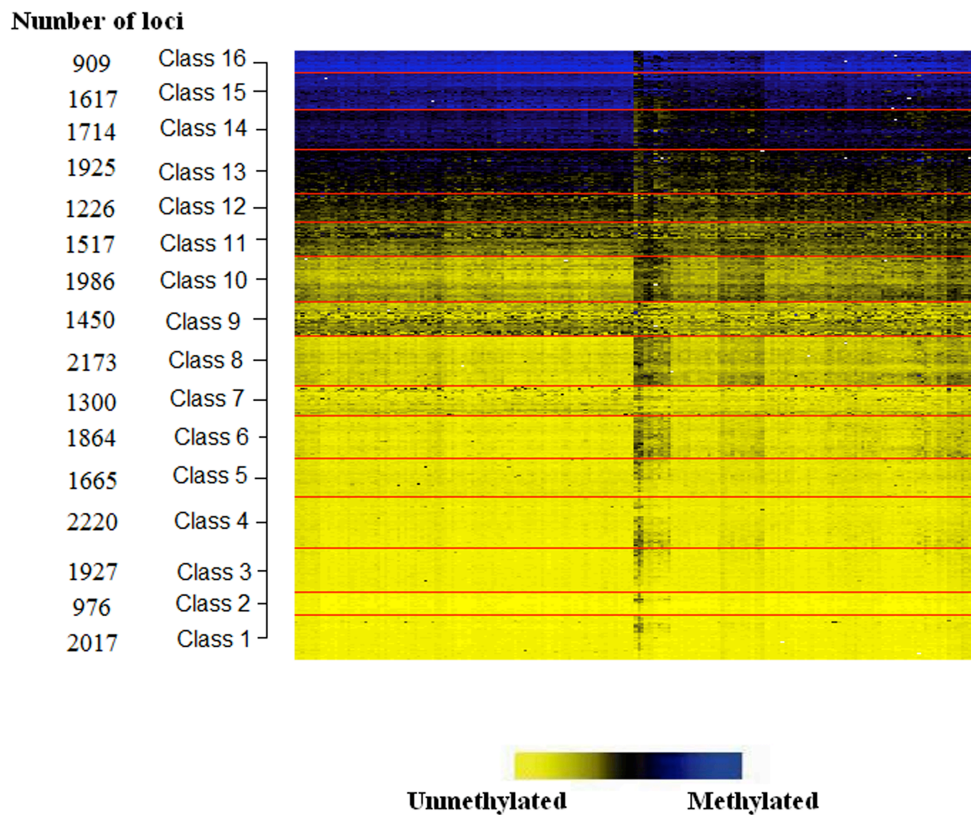

**Figure 1.** Methylation by RPMM class. The heatmap shows the average methylation (beta) by class, with the 16 RPMM-based methylation classes shown in rows and the subjects represented by columns. The number of CpG loci per RPMM class are shown on the left hand panel. The intensity of methylation is represented with yellow depicting lack of methylation and blue depicting methylation. The red lines within the heatmap denote the sixteen classes derived from the RPMM model.

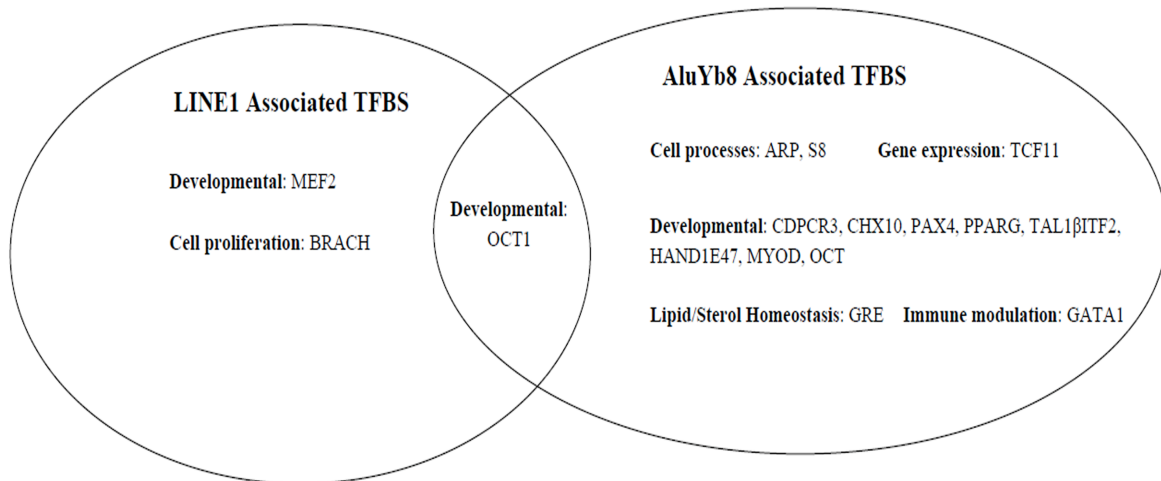

**Figure 2.** Over-representation of transcription factor binding sites (TFBS) within 1kb of differentially methylated loci associated with each individual repetitive element methylation marker (LINE-1 and AluYb8), grouped by functional role or family. Overlapping TFBS associated with both markers are displayed at center.

**Supplementary Text 1.** A series of full thickness cores of parenchymal tissue were taken from each placenta about 2 cm from the cord insertion site, free of the maternal decidua, within 2 hours after delivery. A total of 12 cores were obtained, with 3 obtained from each quadrant of the placenta, totaling approximately 1 g. Each core was approximately 1.0 cm in diameter and 1.5-2.0 cm in thickness. Each sample was rinsed and then placed in RNAlater (Applied Biosystems, Foster City, CA) and stored at 4°C. Placental samples were snap-frozen in liquid nitrogen within 72 hours, and homogenized to powder in a cooled mortar and pestle to combine the samples from all quadrants into a single mixed sample. The subsequent powdered sample was aliquoted into 2 mL cryotubes, and was stored at -80°C until needed for nucleic acids extraction. DNA was extracted and purified from the placenta samples using the QIAamp DNA Mini Kit (Qiagen, Inc., Valencia, CA) following manufacturer's protocols. Purified DNA was quantified using a NanoDrop ND1000 spectrophotometer (ThermoFisher Scientific, Waltham, MA) and 1µg of placental DNA per sample was bisulfite modified using the EZ DNA Methylation Kit D5008 (Zymo Research, Orange, CA).

**Supplementary Text 2.** Performance assessment of recursively partitioned mixture model

(RPMM) versus hierarchical clustering for classification of high-density DNA methylation data.

Although metric (nonparametric) hierarchical clustering is a well-characterized method, it does not scale to tens of thousands of cases; consequently, we used a Recursively Partitioned Mixture

Model (RPMM), a hierarchical mixture-model algorithm described by (Houseman et al. 2008)

and implemented in the R library RPMM ([http://cran.r-](http://cran.r-project.org/web/packages/RPMM/index.html)

[project.org/web/packages/RPMM/index.html](http://cran.r-project.org/web/packages/RPMM/index.html)). Average betas for 26,486 autosomal CpG loci

were clustered via RPMM according to their absolute variation of 91 beta values, as described

below. Thus, the CpGs were hierarchically clustered based on their pattern of absolute variation.

The resulting hierarchy of classes was pruned to 4 binary levels, resulting in  $2^4 = 16$  classes of

CpGs. Note that we compared the consistency of RPMM clustering to that of metric clustering

(using Euclidean distance with Ward's linkage) by pairwise analysis of 100 resampling

experiments. We sampled 1000 probe sets at a time for each experiment, and on a pairwise basis

between sampling runs, used the adjusted Rand index (Rand 1971) to compare the consistency of

the clustering of CpGs that were sampled in both runs (i.e. the intersection of the sampled CpGs

between two experiments). Thus the mean adjusted Rand index was computed by averaging

4950 unique pairs of experiments; standard errors were computed from the approximate

sampling distribution obtained by bootstrapping the 100 individual experiments and averaging

the resulting pairwise comparisons. Mean adjusted Rand index for RPMM was 0.623 (sd =

0.006) and for metric hierarchical clustering it was 0.564 (sd=0.004). Thus, RPMM also

appeared to provide more consistent clustering than the more common nonparametric approach.

## References

Houseman EA, Christensen BC, Yeh RF, Marsit CJ, Karagas MR, Wrensch M, et al. 2008.

Model-based clustering of DNA methylation array data: a recursive-partitioning algorithm for high-dimensional data arising as a mixture of beta distributions. *BMC Bioinformatics* 9:365.

Rand WM. 1971. Objective criteria for the evaluation of clustering methods. *JASA* 66: 846–850.
